# Supplementary material for: Nuclear receptor ERRα contributes to castration-resistant growth of prostate cancer via its regulation of intratumoral androgen biosynthesis
Source: Theranostics. 2020 Mar 4;10(9):4201–16. doi: 10.7150/thno.35589 (PMC7086365; doi:10.7150/thno.35589)
Supplement: Supplementary file 1 — Supplementary figures and tables. [file thnov10p4201s1.pdf]

**Tables S1**

Primer pairs used for reporter gene cloning:

|                          | Forward (5'-3')                                           | Reverse (5'-3')                                  |
|--------------------------|-----------------------------------------------------------|--------------------------------------------------|
| pGL3-AKR1C1-P1           | CGGGGTACCAGGGTGAGTCC<br>TCCAAGTGA                         | CCGCTCGAGCCCTCTGCAC<br>ACTGCCTAAT                |
| pGL3-AKR1C1-P3           | CGGGGTACCGGCTAAAGCAT<br>CAGCTCTGG                         | CCGCTCGAGTGTCAAACCT<br>TTTTGCCACA                |
| pGL3-AKR1C1-P1-deletion  | CGGGGTACCAGGGTGAGTCC<br>TCCAAGTGATTGATGGCAAG<br>TCATGTGAT | CCGCTCGAGCCCTCTGCAC<br>ACTGCCTAAT                |
| pGL3-AKR1C1-P3- deletion | CGGGGTACCCAGGAAGTG<br>AGTTTCAGGAAATTTTACAT<br>TAGGGTAATG  | CATTACCCTAATGTAAAAT<br>TTCCTGAAACTCACTTCCT<br>GG |
| pGL3-CYP11A1             | CGGGGTACCGTCAACTCTGT<br>CCCGTATT                          | CCGCTCGAGCAGGTTTAGC<br>CAGCCATT                  |
| pGL3-CYP11A1-P7-deletion | CGGGGTACCATAACCCTGAGC<br>TGTGCATGT                        | CCGCTCGAGCAGGTTTAGC<br>CAGCCATT                  |

**Table S2**

Primer pairs used for SYBR Green-based qRT-PCR assay:

| Gene targets                  | Forward (5'-3')        | Reverse (5'-3')        |
|-------------------------------|------------------------|------------------------|
| <i>ACTB</i> ( $\beta$ -actin) | ATGGATGATGATATCGCCGCG  | CTCCATGTCGTCCCAGTTGGT  |
| <i>ESRRA</i> ( $ERR\alpha$ )  | GTCCAAAGGGTTCCTCGGAG   | GGATGCCACACCATAGTGGTA  |
| AKR1C2                        | GTAAAGCTCTAGAGGCCGT    | CACCCATGGTTCTTCTCGA    |
| AKR1C3                        | GTAAAGCTTTGGAGGTCAC    | CACCCATCGTTTGTCT       |
| STAR                          | TACGTGGCTACTCAGCATCGAC | TCAACACCTGGCTTCAGAGGCA |
| HSD3B2                        | GGCTGTGCTGGCGGCTAAT    | TGGAATCAAGGCGGAGGC     |
| HSD17B3                       | TGAACGCACCGGATGAAATC   | CTTGCAGGGCCTTGGAATAAT  |
| CYP11A1                       | ACCAGAGACCCATAGGAGTCC  | CAACAGGGGCAAAAAGTTCTTG |
| CYP17A1                       | GGCCCCATCTATTCGGTTCGT  | GCGATACCCTTACGGTTGTTG  |
| SRD5A2                        | CATACGGTTTAGCTTGGGTGT  | GCTTCCGAGATTGTTGGGTAG  |
| <i>KLK3</i> (PSA)             | TTGTCTTCCTCACCTGTCC    | TCACGCTTTTGTTCCTGATG   |
| SR-B1                         | TCCTCACTTCCTCAACGCTG   | TCCCAGTTTGTCCAATGCC    |

**Table S3**

Primer pairs used for ChIP-PCR assay:

|                  | Forward (5'-3')                  | Reverse (5'-3')                  |
|------------------|----------------------------------|----------------------------------|
| AKR1C3-P1        | CGTTGGAGCACCAGATGTAA             | TGTATGCTGCCTTCCCTCTC             |
| AKR1C3-P2        | TTGAGCCAATTTTCCCAGAC             | ACATTGTACTGGCCCAGAGG             |
| AKR1C3-P3        | GGCCATTAGAGGAAGCATCA             | GGCCCATTTCCTGGTATAA              |
| AKR1C3-P4        | ACCAGAGGCTGTCCTTGAGA             | TCTGGGTTACATGCCAAACA             |
| AKR1C3-P5        | TGGGTACCACCCTCTCAGAC             | AGAGGGAATGGGTGTCTCCT             |
| CYP11A1-P1       | TCTGGTATGGCCTTGAGC               | AGGTCTGGCAGCCTTTGA               |
| CYP11A1-P2       | CTTATCCCTGTTGTTCAATG             | GAAATATCTGCCTGTGCTT              |
| CYP11A1-P3       | GGGGAAAGCAGCACAGAT               | TCACCTTGGAACCCTAAT               |
| CYP11A1-P4       | TCATTCCAGGCTCAAGGT               | GCCCATAGATCACCCACA               |
| CYP11A1-P5       | GTGCTGAGACCCTTGGAG               | ATGACCTTGAGCCTGGAA               |
| CYP11A1-P6       | TTGGCTGTACCTGCTGTG               | AGAAGGCGGAAGAACTCA               |
| CYP11A1-P7       | AATCCCTGACTACATAAGC              | AGATGGGACTCAAGGTTAT              |
| Known ERRE       | CCATCCGAGTGGAATTTGAG<br>TCCTAAAG | GAACCGTAGACCCAGTAGCCCC<br>ACAGAG |
| Negative control | GGACTACCAAGGAGAAGCTA             | ATTAATAGCCCTGCCTGGAT             |

**A**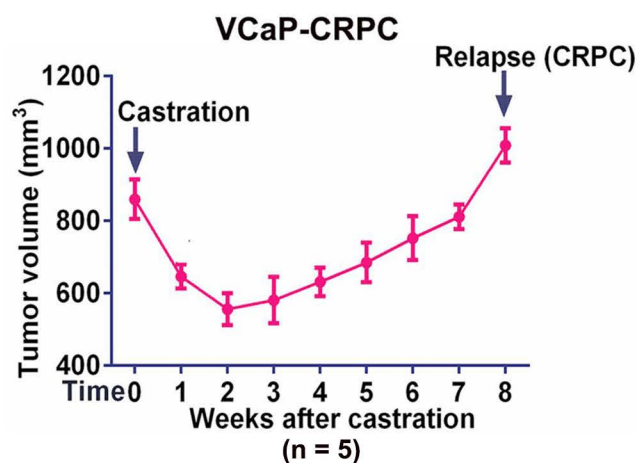**B**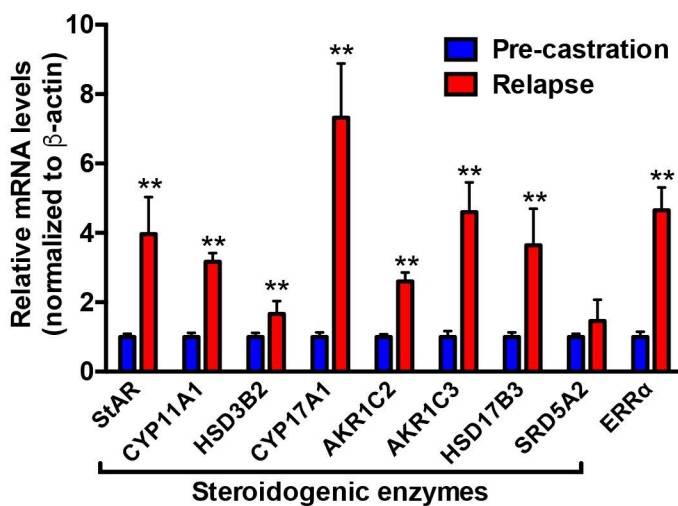**C**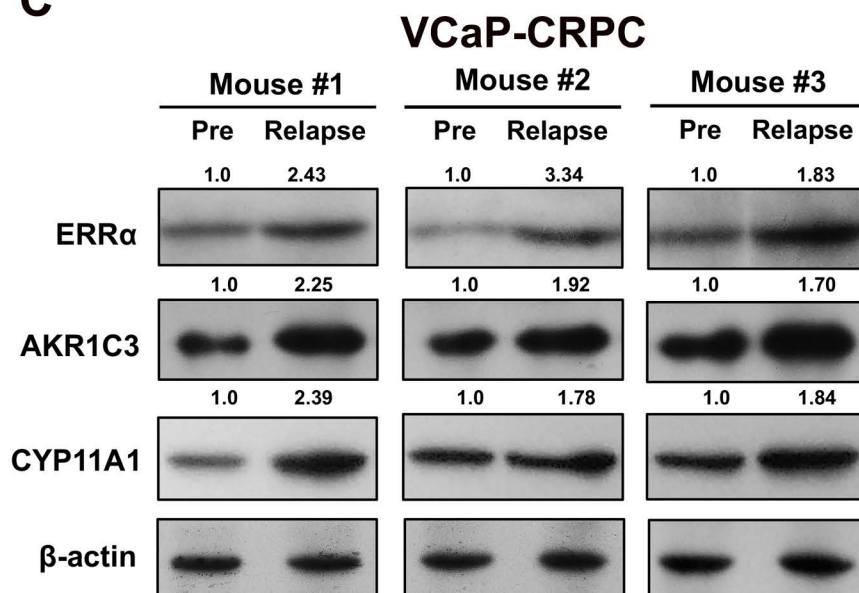**D**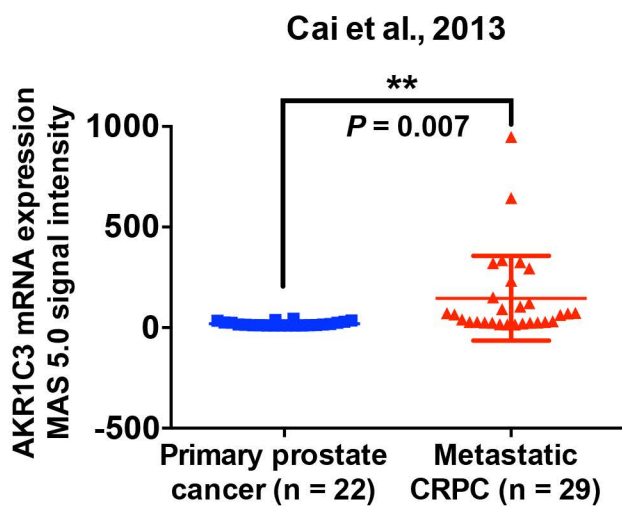**E**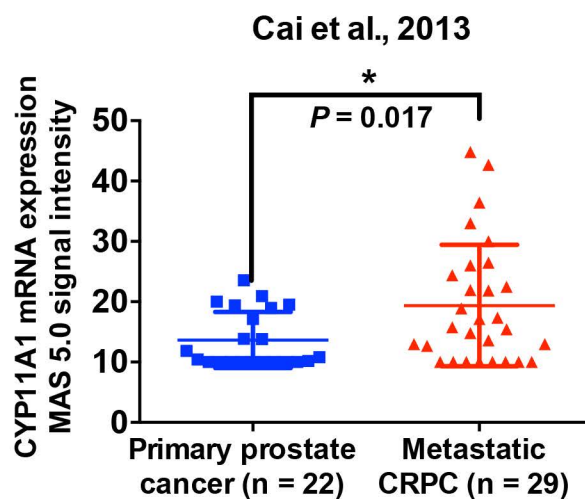**Figure S1**

**Figure S1. (A-C)** VCaP-CRPC castration-relapse prostate cancer xenograft tumors exhibit increased expression of  $ERR\alpha$  and numerous steroidogenic enzymes. **(A)** VCaP-CRPC xenograft tumor model was established based on the relapse of tumors in host mice after castration. **(B)** qRT-PCR analysis. Castration-relapse VCaP-CRPC xenograft tumors expressed significant higher transcript levels of  $ERR\alpha$  and a panel of key steroidogenic enzymes (including, *STAR*, *CYP11A1*, *HSD3B2*, *CYP17A1*, *AKR1C2*, *AKR1C3*, *HSD17B3* and *SDR5A2*) as compared to same tumors before castration. **(C)** Immunoblot analysis. VCaP-CRPC tumors expressed higher protein levels of  $ERR\alpha$ , AKR1C3 and CYP11A1 as compared to pre-castration (Pre) VCaP tumors. Data are represented as mean  $\pm$  SD (n = 3) and analyzed by Students' *t*-test. \*\*,  $P < 0.01$  versus pre-castration VCaP tumors. **(D and E)** mRNA Expression profiles of **(D)** AKR1C3 and **(E)** CYP11A1 as revealed from a GEO cohort (GSE32269; Cai et al., 2013) of metastatic CRPC. Results showed that bone-metastatic CRPC samples exhibited significant higher mRNA levels of AKR1C3 and CYP11A1 as compared to localized prostate cancer.

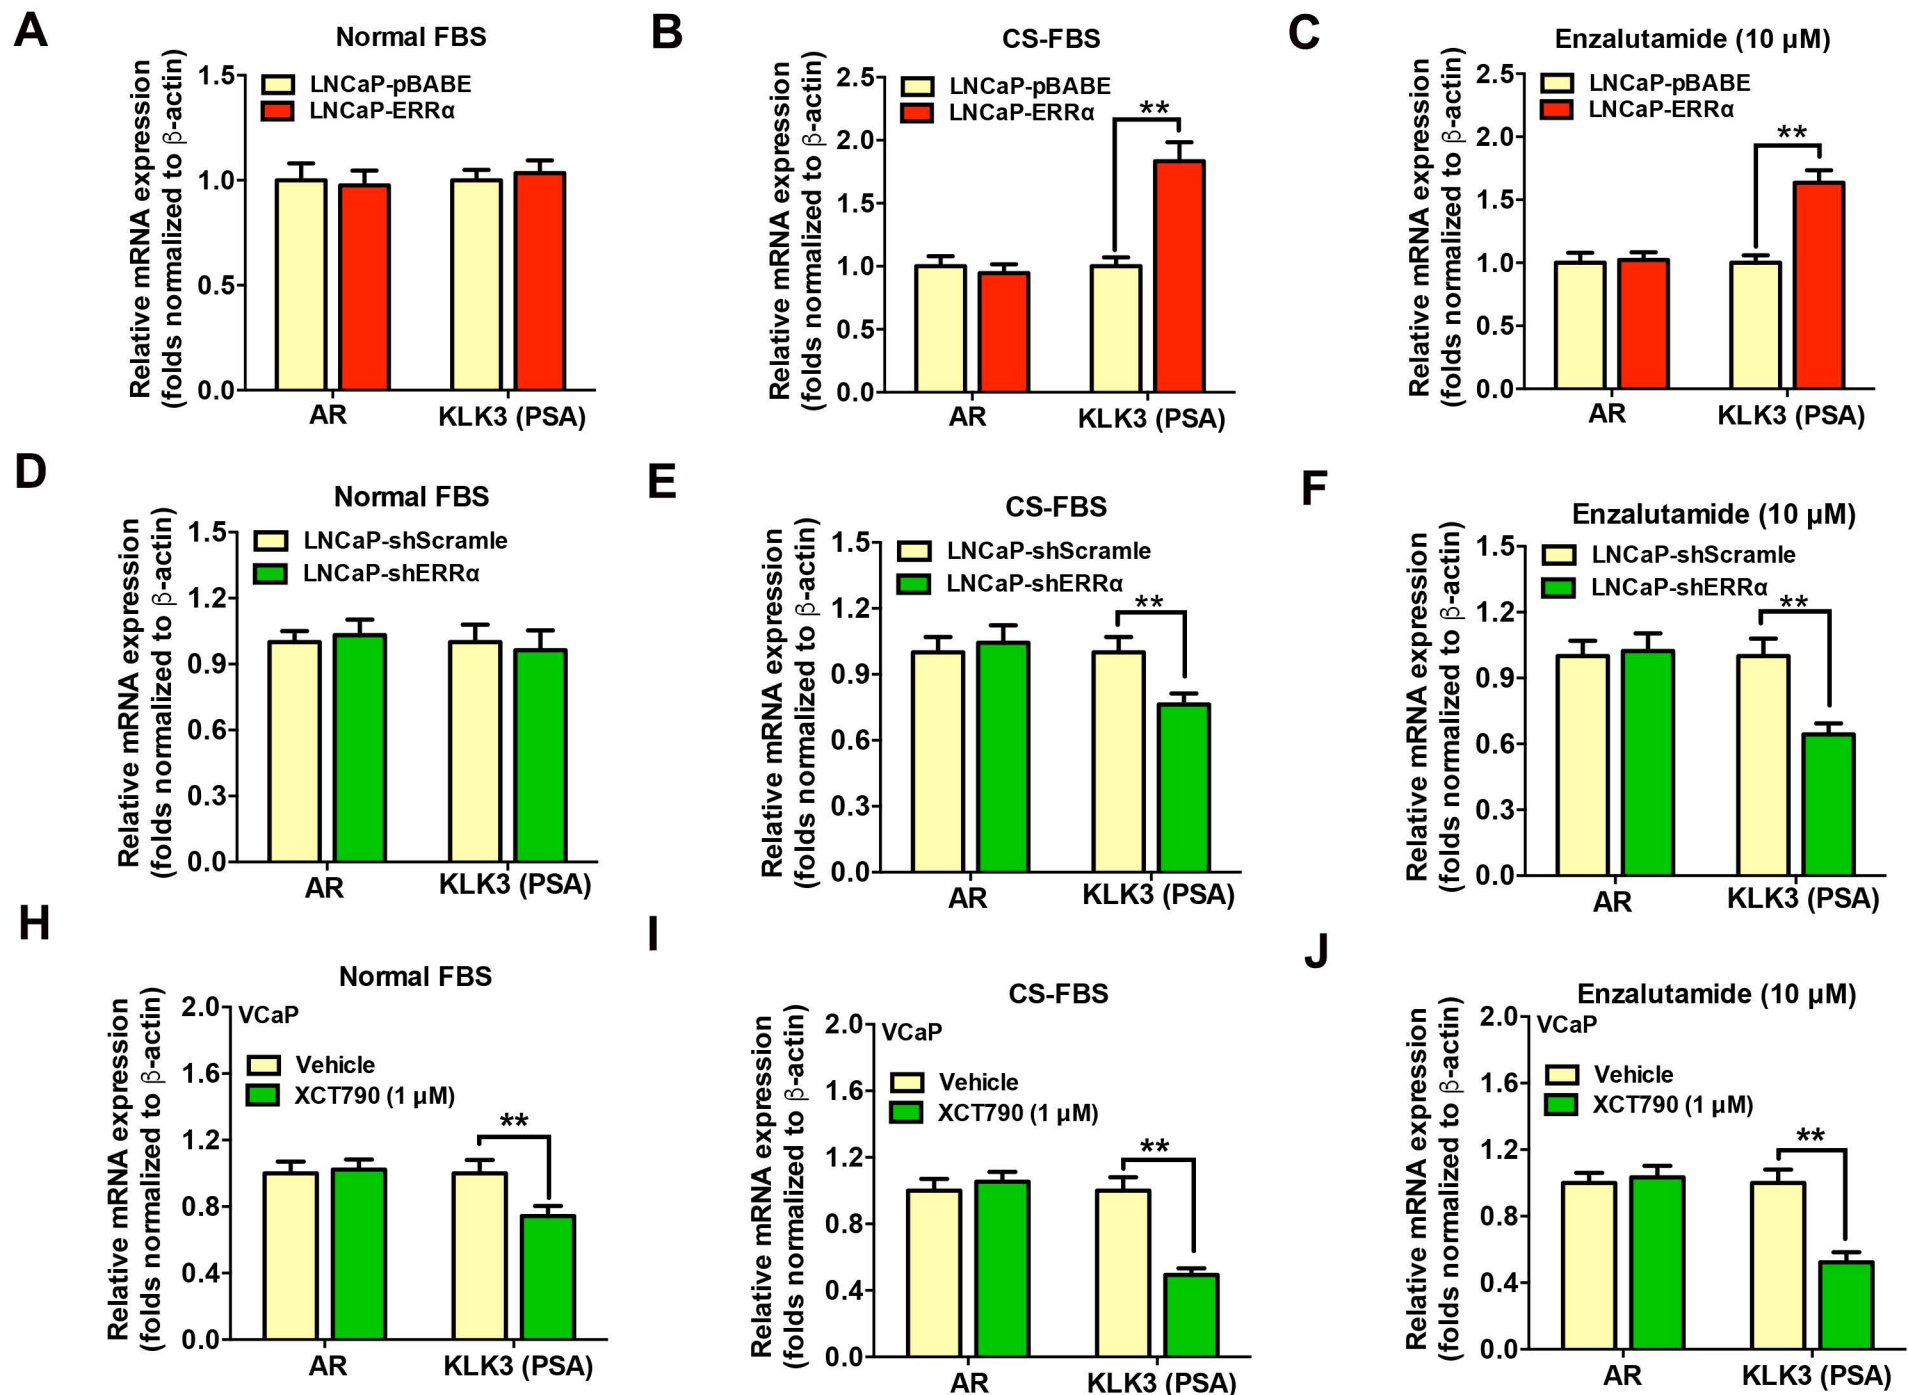

Figure S2

**Figure S2.** qPCR analyses of AR and PSA mRNA levels in experiments conducted in Figure 2. **(A-C)** qRT-PCR analysis of AR and PSA mRNA expression levels in LNCaP-ERR $\alpha$  and LNCaP-pBABE cells under normal culture condition, androgen-deprivation culture condition (CS-FBS) and Enzalutamide treatment. **(A)** Results showed that AR and PSA mRNA expression levels showed no difference in LNCaP-ERR $\alpha$  as compared to LNCaP-pBABE cells under normal culture condition. **(C and D)** However, when being cultured with CS-FBS or Enzalutamide, LNCaP-ERR $\alpha$  cells exhibited increased expression level of PSA mRNA as compared to LNCaP-pBABE cells. **(D-F)** qRT-PCR analysis of AR and PSA mRNA expression levels in LNCaP-shERR $\alpha$  and LNCaP-shScramble cells under normal culture condition, androgen-deprivation culture condition and Enzalutamide treatment. **(D)** Results showed that AR and PSA mRNA expression levels showed no difference in LNCaP-shERR $\alpha$  as compared to LNCaP-shScramble cells under normal culture condition. **(E and F)** However, when being cultured with CS-FBS or Enzalutamide, LNCaP-shERR $\alpha$  cells exhibited decreased expression level of PSA mRNA as compared to LNCaP-shScramble cells. **(H-J)** XCT790 treatment of VCaP cells. XCT790 treatment could significantly suppress the expression of PSA mRNA in VCaP cells cultured with normal FBS, with more significant inhibitory effect under androgen-deprivation culture condition or Enzalutamide treatment.

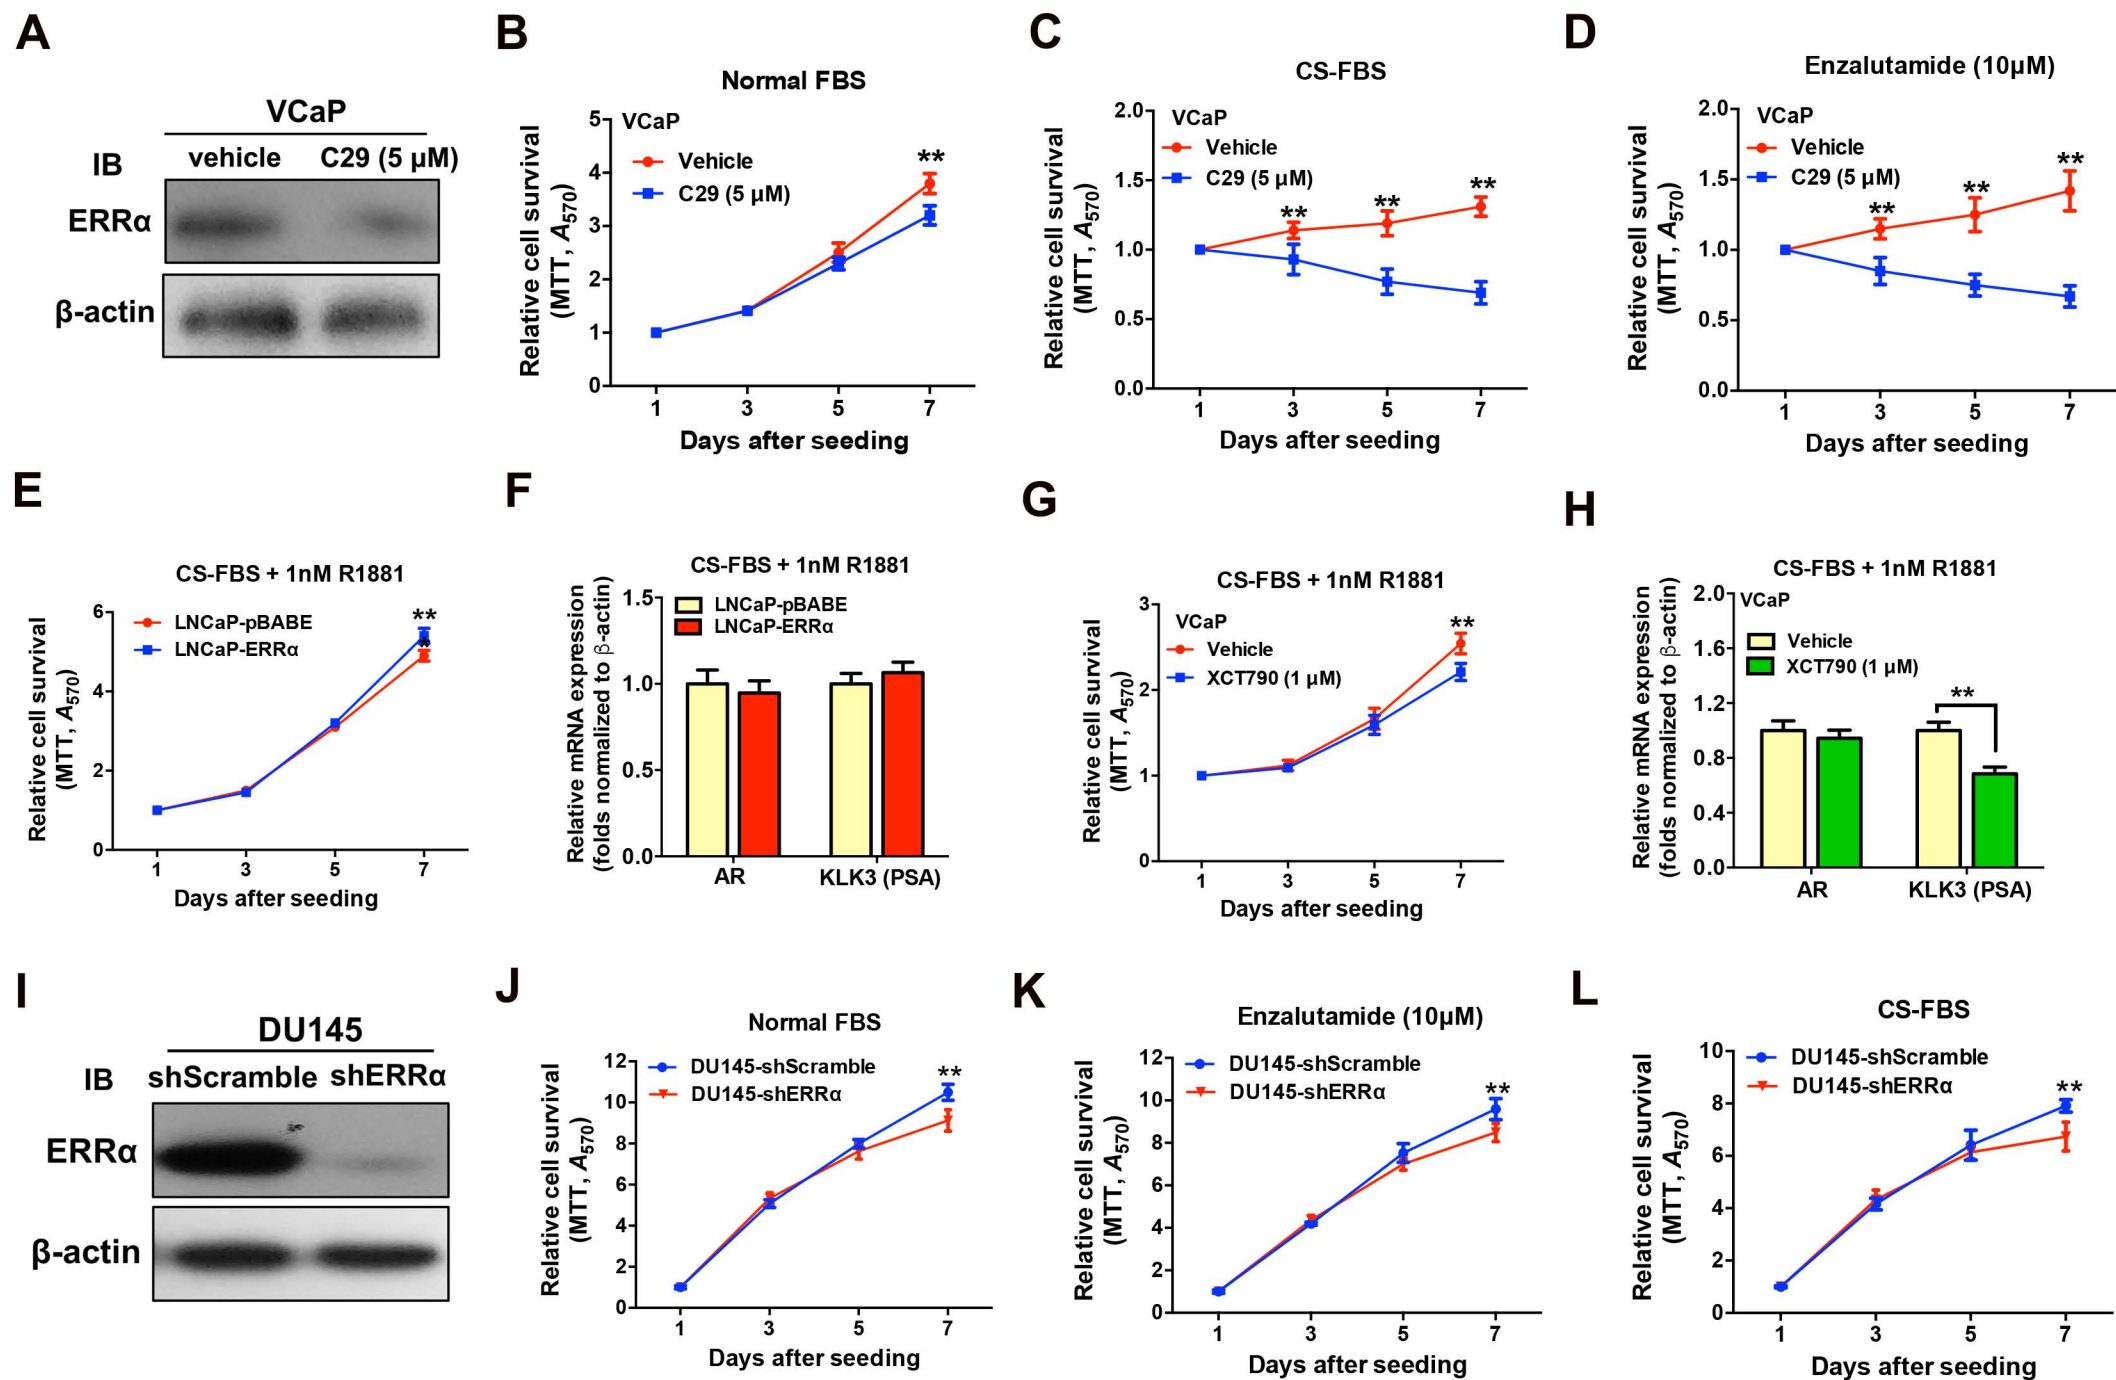

Figure S3

**Figure S3.** (A) Immunoblot analysis showed that C29 treatment could significantly reduce or abolish the protein level of ERR $\alpha$  in VCaP cells. (B-D) C29 treatment could significantly suppress the *in vitro* growth of VCaP cells cultured with CS-FBS or Enzalutamide. (E) *In vitro* growth responses of LNCaP-pBABE and LNCaP-ERR $\alpha$  cells cultured in CS-FBS supplemented with R1881 assayed by MTT. The suppressed growth of LNCaP-ERR $\alpha$  and LNCaP-pBABE cells cultured with CS-FBS could be restored upon supplement with R1881, with no significant difference on their growth responses between the two treated groups until Day-7. (F) qRT-PCR analysis of AR and PSA mRNA expression levels in LNCaP-ERR $\alpha$  and LNCaP-pBABE cells cultured in CS-FBS supplemented with R1881 for 7 days. Results showed that AR and PSA mRNA expression levels showed no difference in LNCaP-ERR $\alpha$  as compared to LNCaP-pBABE cells. (G) *In vitro* growth responses of VCaP cell upon XCT790 or vehicle treatment cultured with CS-FBS supplemented with R1881 assayed by MTT. The suppressed growth of VCaP cultured with CS-FBS could be restored upon supplement with R1881, with no significant difference on their growth responses upon XCT790 or vehicle treatment until day-7. (H) qRT-PCR analysis of AR and PSA mRNA in VCaP cells cultured with CS-FBS supplemented with R1881 for 7 days. Results showed that PSA mRNA expression levels was reduced in VCaP cell upon XCT790 treatment as compared to vehicle without change of AR mRNA levels. (I) Immunoblot validation of stable ERR $\alpha$ -knockdown in DU145-shERR $\alpha$  cells. (J-L) *In vitro* growth responses of DU145-shERR $\alpha$  cells cultured with normal FBS, CS-FBS or Enzalutamide. No significant change in growth responses was observed in DU145-shERR $\alpha$  cells upon cultures with normal FBS (J), charcoal-stripped FBS (K) and Enzalutamide (L), as compared to DU145-shScramble cells until Day-7. \*\*,  $P < 0.01$  versus DU145-shScramble cells.

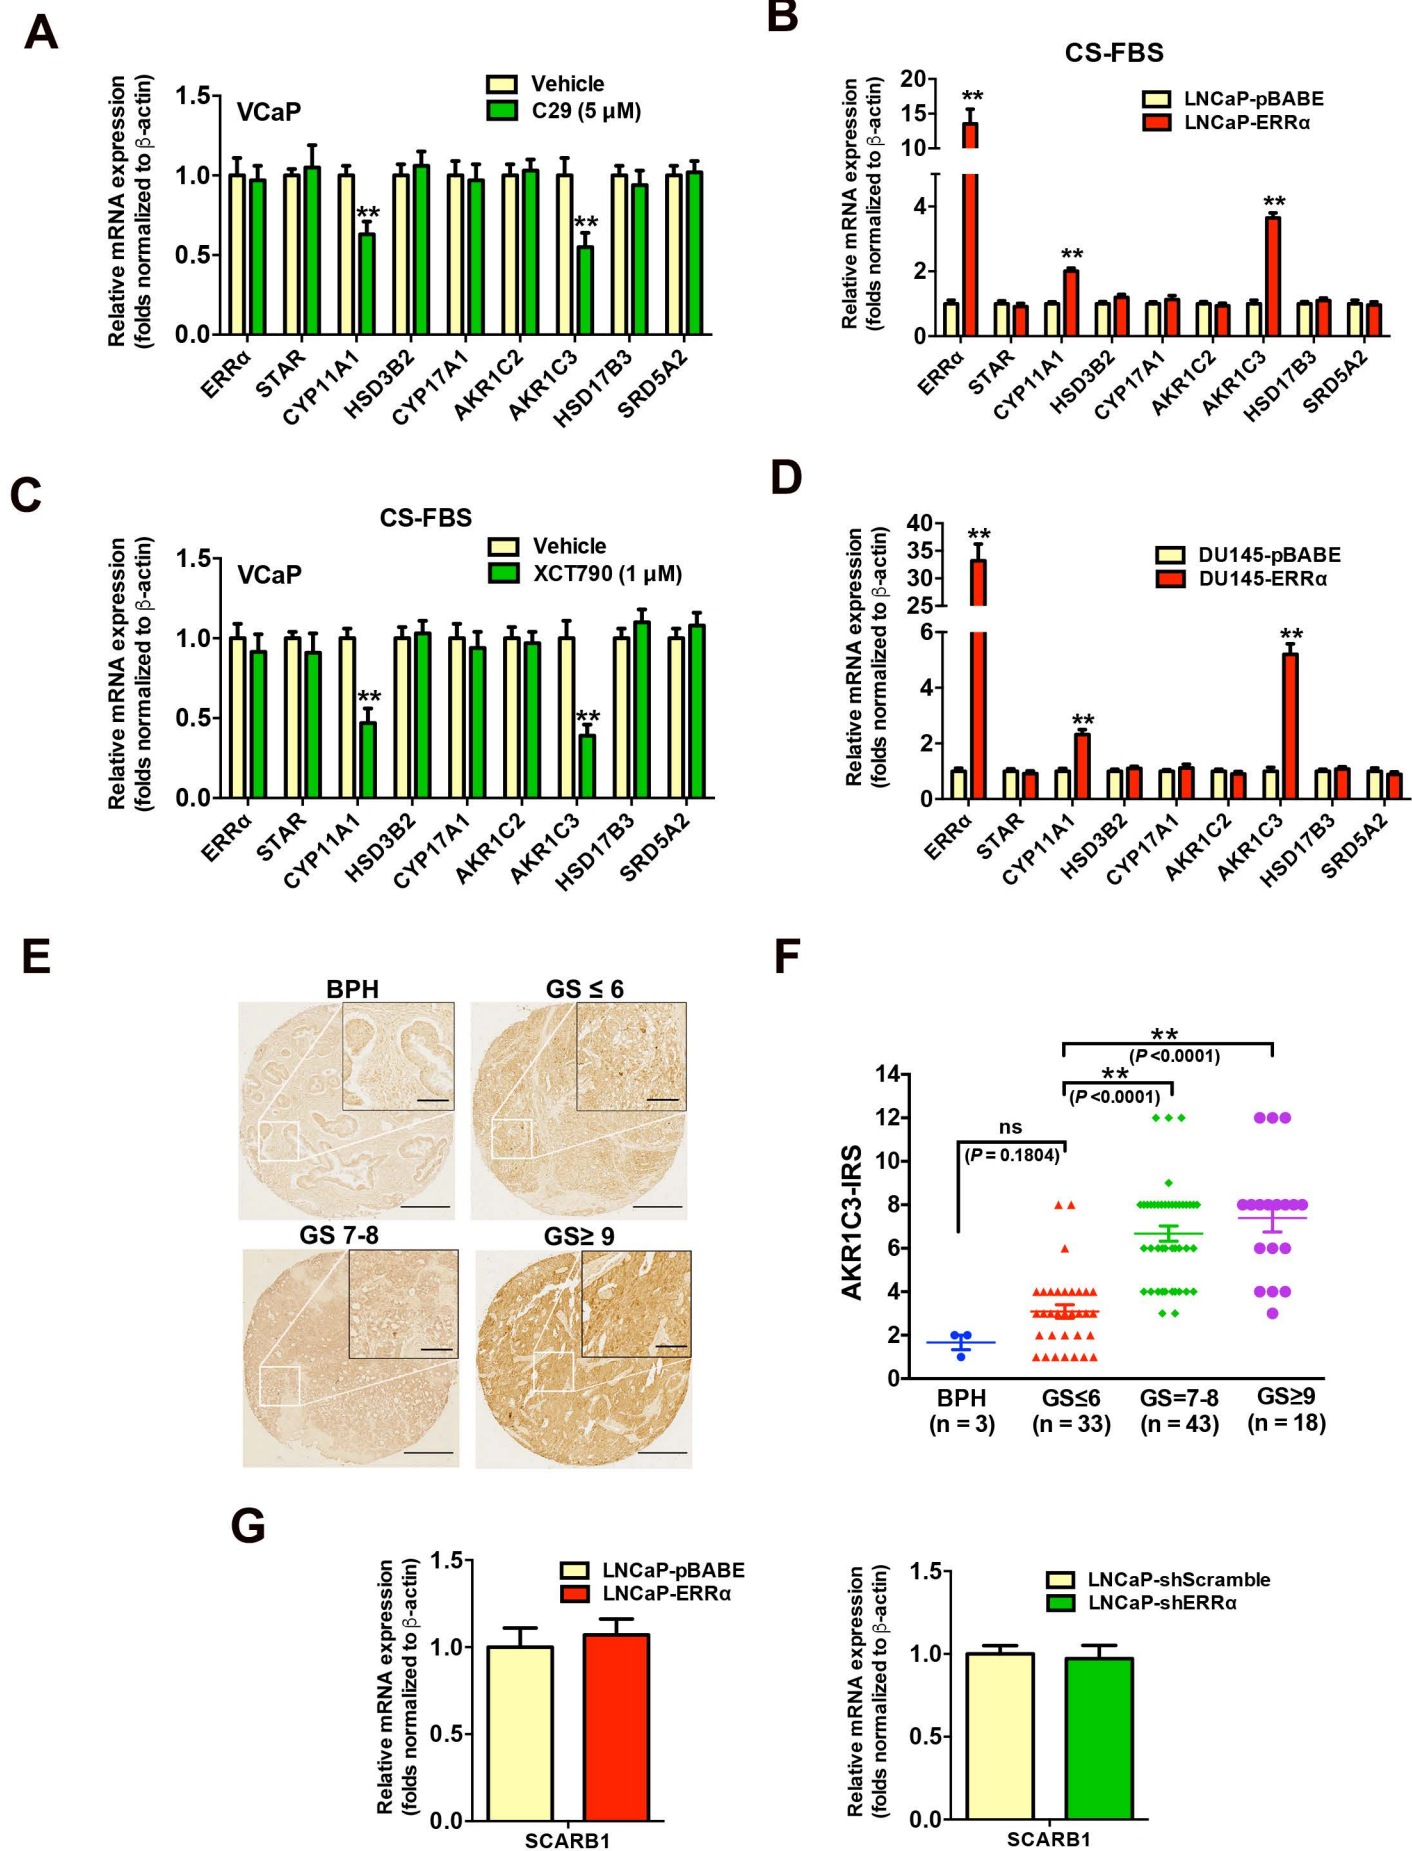

**Figure S4**

**Figure S4. (A-D)** qRT-PCR analysis. **(A)** C29 treatment. C29 treatment could significantly suppress the mRNA levels of CYP11A1 and AKR1C3 in VCaP cells. **(B)** LNCaP-ERR $\alpha$  cells expressed higher transcript levels of CYP11A1 and AKR1C3 as compared to empty vector LNCaP-pBABE cells under androgen-deprivation culture condition (CS-FBS). **(C)** XCT790 treatment. XCT790 treatment could significantly suppress the mRNA levels of CYP11A1 and AKR1C3 in VCaP cells under androgen-deprivation culture condition (CS-FBS). **(D)** DU145-ERR $\alpha$  cells expressed higher transcript levels of CYP11A1 and AKR1C3 as compared to empty vector DU145-pBABE cells. **(E)** AKR1C3 immunohistochemistry. Representative micrographs of AKR1C3-immunostained tissue microarray spots of benign prostatic hyperplasia (BPH) and malignant lesions. A significant increase of cytoplasmic AKR1C3 immunosignals was detected in malignant cells in adenocarcinoma lesions with higher Gleason scores. Magnification,  $\times 40$ ; scale bars, 250  $\mu\text{m}$ . Insets show the enclosed areas at higher magnification. Magnification,  $\times 200$ ; scale bars, 50  $\mu\text{m}$ . **(F)** AKR1C3 immunoreactive score (AKR1C3-IRS) performed on BPH and neoplastic prostatic tissues. Adenocarcinomas with higher Gleason scores ( $\text{GS} \geq 7$ ) showed significantly higher AKR1C3 expression than benign hyperplastic tissues. **(G)** qRT-PCR analysis. SCARB1 mRNA expression levels showed no difference in either LNCaP-ERR $\alpha$  or LNCaP-shERR $\alpha$  cells as compared to their control LNCaP-pBABE or LNCaP shScramble cells. \*\*,  $P < 0.01$  versus LNCaP-pBABE cells, LNCaP-shScramble cells, DU145-shScramble cells or vehicle treatment.

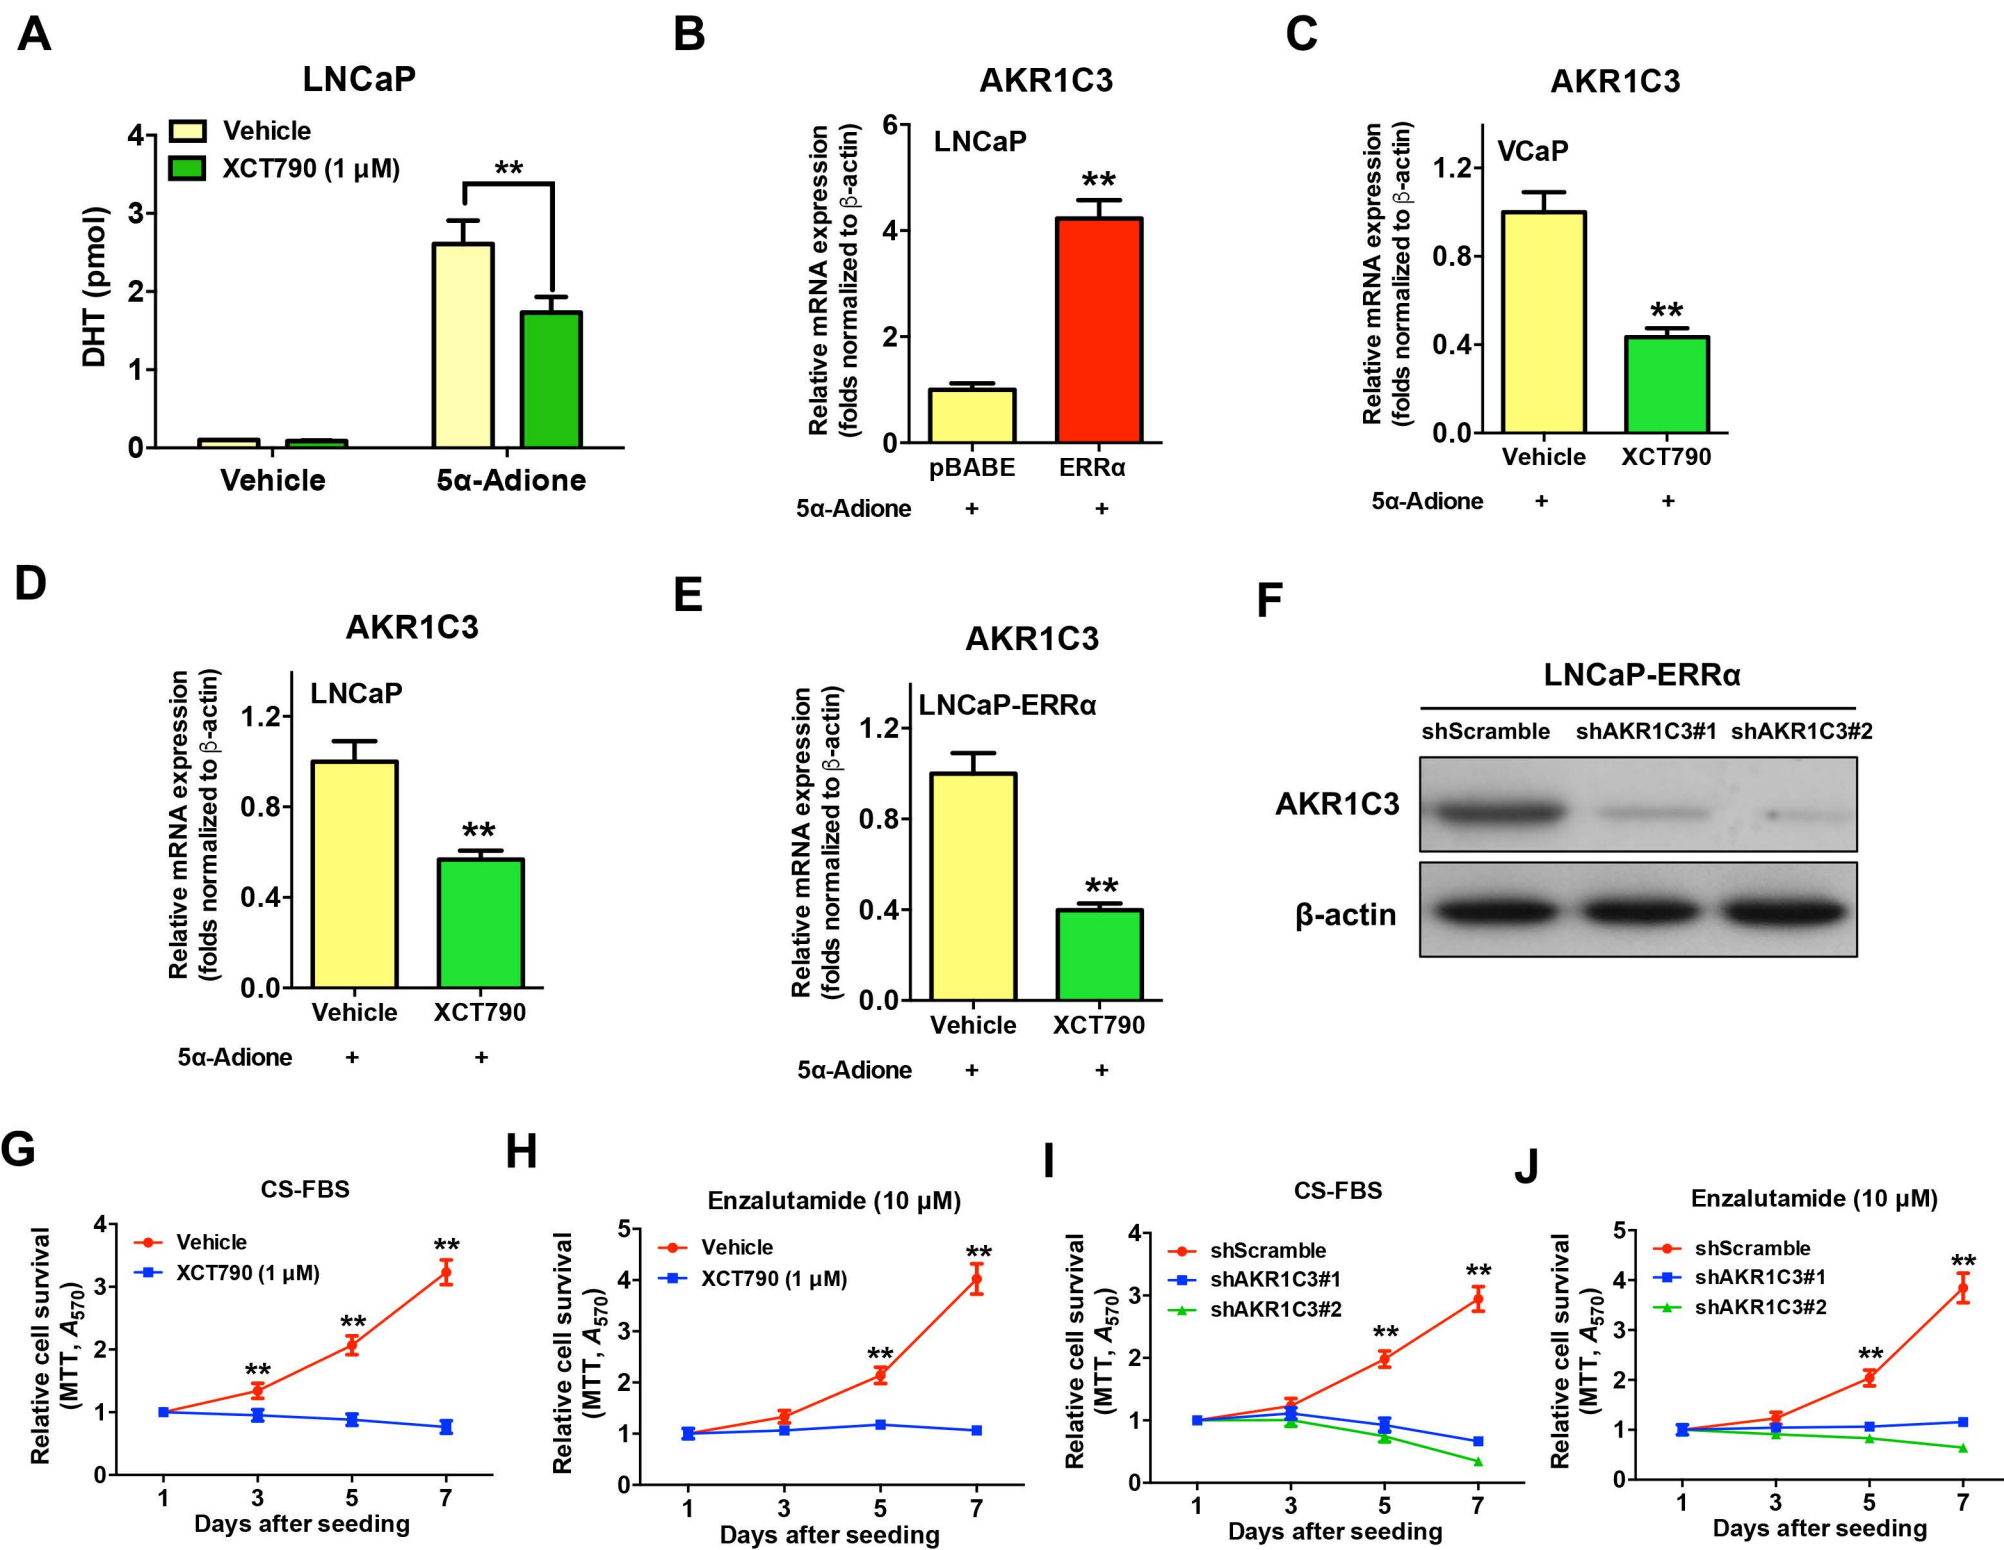

Figure S5

**Figure S5.** (A) UPLC-MS/MS measurement of DHT in XCT790-treated LNCaP cells. Results showed that suppression of  $ERR\alpha$  activity by XCT790 could significantly reduce the DHT level in  $5\alpha$ -Adione-supplemented LNCaP cells. (B-E) qPCR analyses of AKR1C3 mRNA levels in experiments conducted in Figures 6B-D and Figure 4SA. (F) Immunoblot validation of stable AKR1C3-knockdown in LNCaP- $ERR\alpha$  cells. (G-J) XCT790 treatment and AKR1C3 knockdown could significantly could re-sensitize LNCaP- $ERR\alpha$  cells to culture condition with CS-FBS or Enzalutamide.

**A**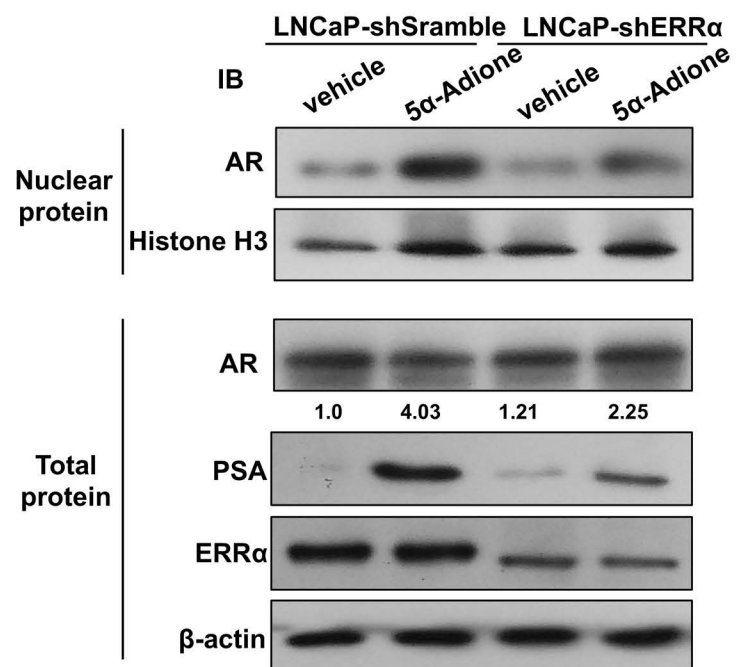**B**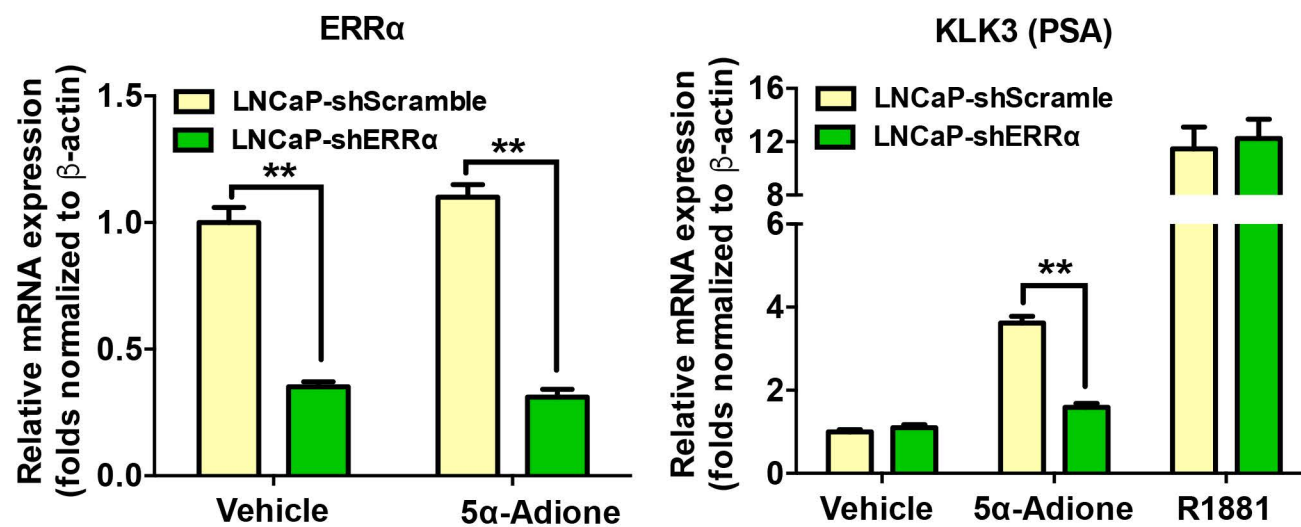**Figure S6**

**Figure S6.** ERR $\alpha$ -knockdown attenuates the AR signaling in prostate cancer cells. **(A)** Immunoblot analysis of AR and PSA expressions in LNCaP-shERR $\alpha$  and LNCaP-shScramble transduced cells. Results showed that knockdown of ERR $\alpha$  could lessen the enhanced nuclear AR and PSA levels induced by 5 $\alpha$ -Adione supplement. **(B)** qRT-PCR analysis of ERR $\alpha$  and KLK3 (PSA) expression in 5 $\alpha$ -Adione-supplemented LNCaP-shERR $\alpha$  and LNCaP-shScramble cells. Knockdown of ERR $\alpha$  could significantly reduce the KLK3 mRNA level in LNCaP-shERR $\alpha$  cells as compared to LNCaP-shScramble cells, with 5 $\alpha$ -Adione supplement. Supplement with R1881 induced increase of PSA mRNA levels in both LNCaP-shScramble and LNCaP-shERR $\alpha$  cells at same levels. \*\*,  $P < 0.01$  versus LNCaP-shScramble cells.

**A**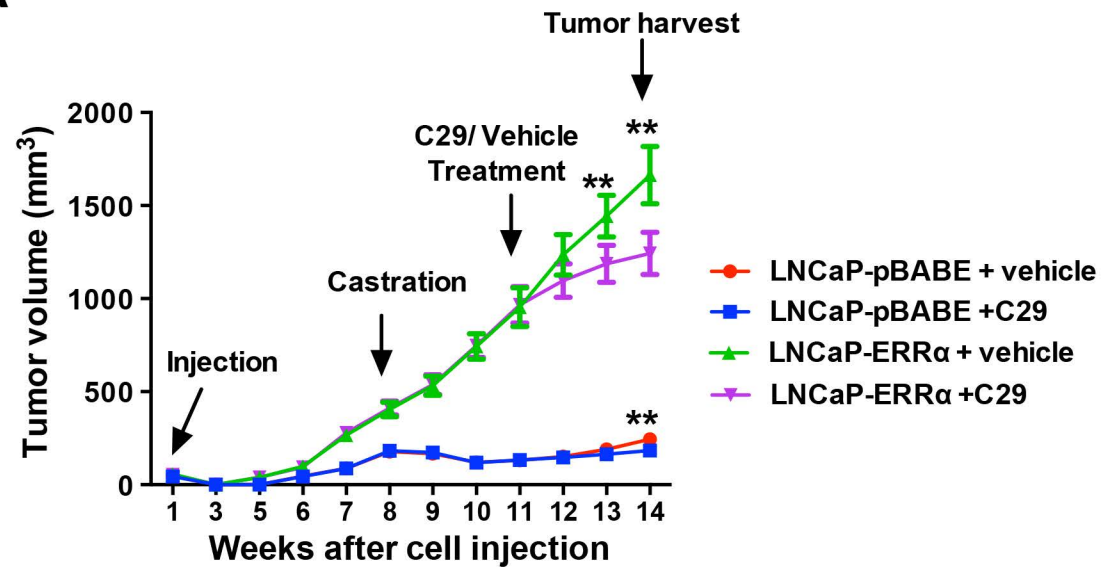**B**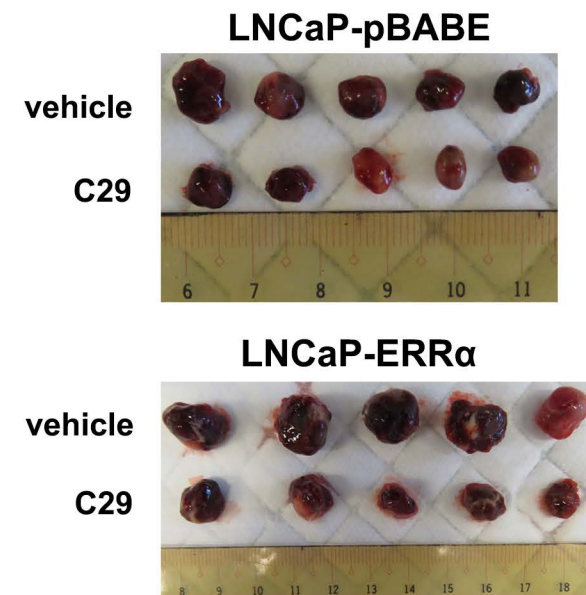**C**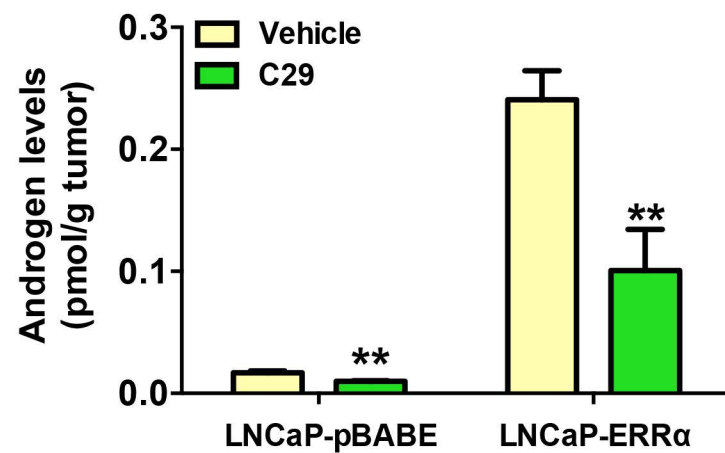**D**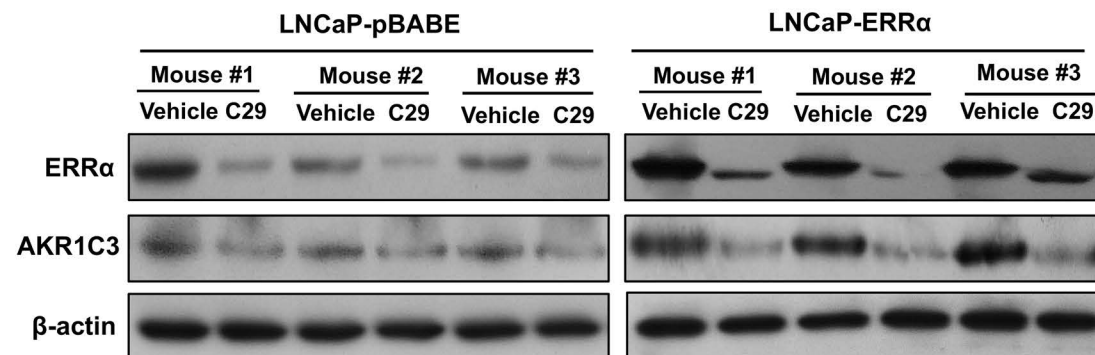**Figure S7**

**Figure S7.** ERR $\alpha$  inverse agonist C29 suppresses *in vivo* castration-resistant growth of prostate cancer cells. **(A)** Growth curve of castration-relapsed LNCaP-pBABE and LNCaP-ERR $\alpha$  xenograft tumors upon C29 or vehicle treatment for 3 weeks. Results showed that C29 could significantly retard the castration-relapsed growth of both LNCaP-pBABE and LNCaP-ERR $\alpha$  tumors as compared to vehicle. **(B)** Images show the representative dissected LNCaP-pBABE and LNCaP-ERR $\alpha$  xenograft tumors upon 3-week treatment with C29 or vehicle in castrated host. **(C)** Measurement of DHT in LNCaP-pBABE and LNCaP-ERR $\alpha$  xenograft tumors by LC-MS/MS. Significant reduction of DHT levels was detected in tumors upon C29 treatment as compared to vehicle. **(D)** Immunoblot analysis. LNCaP-pBABE and LNCaP-ERR $\alpha$  tumors upon C29 treatment expressed lower protein levels of ERR $\alpha$  and AKR1C3 as compared to vehicle. \*\*,  $P < 0.01$  versus vehicle.
